# Supplementary material for: Pectin from Fruit- and Berry-Juice Production by-Products: Determination of Physicochemical, Antioxidant and Rheological Properties
Source: MDPI journal article supplement (doi:10.3390/foods12081615), 2023-04-11
Supplement: s1 [file s1]

Manuscript-Supplementary **Table S1.**

**Table S1.** Monosaccharide and uronic acid content in pectin

| samples (g 100 g <sup>-1</sup> ) | Cherry BPP                | Red Currant BPP           | Gooseberry BPP             | Black Currant BPP           | Plum BPP                  | Rhu BPP                   | Apple BPP                 | Pumpkin BPP                | Control                   |
|----------------------------------|---------------------------|---------------------------|----------------------------|-----------------------------|---------------------------|---------------------------|---------------------------|----------------------------|---------------------------|
| Fuc                              | 0.14 ± 0.03               | 0.19 ± 0.02               | 0.11 ± 0.02                | 0.17 ± 0.02                 | 0.08 ± 0.02               | 0.14 ± 0.02               | 0.22 ± 0.01               | 0.18 ± 0.01                | 0.13 ± 0.03               |
| Rha                              | 12.13 ± 0.70              | 4.82 ± 0.35               | 6.92 ± 0.20                | 5.56 ± 0.38                 | 5.55 ± 0.96               | 3.82 ± 0.74               | 10.12 ± 0.62              | 5.06 ± 1.29                | 3.81 ± 0.97               |
| Ara                              | 2.94 ± 0.90               | 1.76 ± 0.09               | 2.70 ± 0.31                | 1.58 ± 0.09                 | 3.10 ± 0.99               | 6.30 ± 0.45               | 2.68 ± 0.36               | 2.53 ± 1.51                | 1.40 ± 0.07               |
| Gal                              | 6.20 ± 1.82 <sup>b</sup>  | 3.89 ± 0.37 <sup>d</sup>  | 9.04 ± 0.44 <sup>b c</sup> | 11.91 ± 2.23 <sup>c</sup>   | 21.72 ± 1.95 <sup>a</sup> | 20.58 ± 1.37 <sup>a</sup> | 4.28 ± 0.41 <sup>e</sup>  | 8.35 ± 0.83 <sup>b</sup>   | 7.42 ± 0.89 <sup>b</sup>  |
| Glu                              | 15.0 ± 2.82 <sup>b</sup>  | 4.57 ± 0.26 <sup>c</sup>  | 5.84 ± 0.10 <sup>c</sup>   | 8.63 ± 1.61 <sup>d</sup>    | 23.40 ± 2.43 <sup>a</sup> | 12.14 ± 1.38 <sup>b</sup> | 22.95 ± 2.95 <sup>a</sup> | 6.92 ± 0.47 <sup>c d</sup> | 10.38 ± 1.54 <sup>b</sup> |
| Xyl                              | 0.36 ± 0.02               | 0.31 ± 0.07               | 0.22 ± 0.00                | 0.56 ± 0.13                 | 0.58 ± 0.13               | 0.50 ± 0.11               | 1.32 ± 0.19               | 0.45 ± 0.01                | 2.13 ± 0.41               |
| Man                              | 0.57 ± 0.03               | 0.14 ± 0.01               | 0.13 ± 0.02                | 0.55 ± 0.05                 | 0.31 ± 0.12               | 0.17 ± 0.08               | 0.08 ± 0.02               | 0.41 ± 0.04                | 0.14 ± 0.08               |
| 4O-MeGlcA                        | 0.22 ± 0.14               | 0.49 ± 0.22               | 0.05 ± 0.06                | 0.57 ± 0.16                 | 0.07 ± 0.10               | 0.06 ± 0.01               | 0.16 ± 0.09               | n.d.                       | 0.20 ± 0.02               |
| GalA                             | 59.06 ± 9.79 <sup>a</sup> | 83.57 ± 0.56 <sup>c</sup> | 74.88 ± 0.42 <sup>b</sup>  | 69.16 ± 4.00 <sup>b a</sup> | 47.22 ± 3.63 <sup>d</sup> | 55.77 ± 0.60 <sup>a</sup> | 57.80 ± 2.45 <sup>a</sup> | 75.34 ± 0.04 <sup>b</sup>  | 74.04 ± 3.73 <sup>b</sup> |
| GlcA                             | 0.09 ± 0.02               | 0.10 ± 0.01               | 0.13 ± 0.09                | 0.21 ± 0.09                 | 0.38 ± 0.07               | 0.52 ± 0.08               | 0.39 ± 0.09               | 0.76 ± 0.16                | 0.13 ± 0.01               |

BPP – by-product pectin, n.d. – not detected. Each pectin sample was prepared and subsequently analysed in triplicate (n = 3), ± standard deviation (SD). Values superscripted in rows with different letters (a, b, c, d, e) are statistically different (p< 0.05). Fuc (fucose, g 100 g<sup>-1</sup>); Rha (rhamnose, g 100 g<sup>-1</sup>); Ara (arabinose, g 100 g<sup>-1</sup>); Gal (galactose g 100 g<sup>-1</sup>); Glu (glucose, g 100 g<sup>-1</sup>); Xyl (xylose, g 100 g<sup>-1</sup>); Man (mannose, g 100 g<sup>-1</sup>).
